# Supplementary material for: Macrophage-stimulating activity of European eel (Anguilla anguilla) peptides in RAW264.7 cells mediatedviaNF-κB and MAPK signaling pathways
Source: Royal Society of Chemistry journal article supplement (doi:10.1039/d0fo02497j), 2020-01-01
Supplement: d0fo02497j1.pdf [file d0fo02497j1.pdf]

Table S1 Peptides identified in Fr-1-1 using the NCBI database of taxonomy of *Anguilla*.

| Protein number | Accession number <sup>a</sup> | Description                                                 | Peptide sequence <sup>b</sup> | -10lgP | Mass    | Reten tion time (min) | XIC rea | Start | End  |
|----------------|-------------------------------|-------------------------------------------------------------|-------------------------------|--------|---------|-----------------------|---------|-------|------|
| 1              | BAP63926.1                    | type I collagen proa3 chain<br>[ <i>Anguilla japonica</i> ] | ApGKDGDVGAp<br>GApGPA         | 18.14  | 1480.68 | 19.2                  | 1.6E+08 | 590   | 606  |
| 1              | BAP63926.1                    | type I collagen proa3 chain<br>[ <i>Anguilla japonica</i> ] | DGmnGLpGPIGp<br>PGPR          | 26.73  | 1579.73 | 31.7                  | 1.4E+08 | 1134  | 1149 |
| 1              | BAP63926.1                    | type I collagen proa3 chain<br>[ <i>Anguilla japonica</i> ] | DGmnGLpGPIGP<br>pGPR          | 28.6   | 1579.73 | 30.6                  | 1.1E+08 | 1134  | 1149 |
| 1              | BAP63926.1                    | type I collagen proa3 chain<br>[ <i>Anguilla japonica</i> ] | GLpGQDGRpG                    | 17.25  | 984.46  | 17.8                  | 6.2E+07 | 538   | 547  |
| 1              | BAP63926.1                    | type I collagen proa3 chain<br>[ <i>Anguilla japonica</i> ] | GLpGQDGRpGA<br>pGPA           | 18.36  | 1393.66 | 21.3                  | 5.4E+07 | 538   | 552  |
| 1              | BAP63926.1                    | type I collagen proa3 chain<br>[ <i>Anguilla japonica</i> ] | GFpGADGAGGP<br>K              | 29.93  | 1045.48 | 21.9                  | 4.5E+07 | 475   | 486  |
| 1              | BAP63926.1                    | type I collagen proa3 chain<br>[ <i>Anguilla japonica</i> ] | LpGQDGRpGAp<br>GPA            | 23.88  | 1336.64 | 19.6                  | 3.6E+07 | 539   | 552  |
| 1              | BAP63926.1                    | type I collagen proa3 chain<br>[ <i>Anguilla japonica</i> ] | GEpGEpGASGP<br>mGPR           | 25.72  | 1442.61 | 18.3                  | 3.1E+07 | 187   | 201  |
| 1              | BAP63926.1                    | type I collagen proa3 chain<br>[ <i>Anguilla japonica</i> ] | AGPpGPpGPGG<br>K              | 24     | 1019.5  | 17.2                  | 2.5E+07 | 873   | 884  |

---

|   |            |               |   |                   |                              |       |         |      |         |     |      |
|---|------------|---------------|---|-------------------|------------------------------|-------|---------|------|---------|-----|------|
| 1 | BAP63926.1 | type<br>proa3 | I | collagen<br>chain | GADGGPGKDG<br>L              | 21.58 | 942.44  | 21.2 | 2.5E+07 | 733 | 743  |
|   |            |               |   |                   | [ <i>Anguilla japonica</i> ] |       |         |      |         |     |      |
| 1 | BAP63926.1 | type<br>proa3 | I | collagen<br>chain | GPAGPpGKnGD<br>DGE           | 18.11 | 1283.53 | 16.4 | 2.4E+07 | 202 | 215  |
|   |            |               |   |                   | [ <i>Anguilla japonica</i> ] |       |         |      |         |     |      |
| 1 | BAP63926.1 | type<br>proa3 | I | collagen<br>chain | GATGEAGKPGE<br>GGPA          | 18.02 | 1254.58 | 17.7 | 2.1E+07 | 631 | 645  |
|   |            |               |   |                   | [ <i>Anguilla japonica</i> ] |       |         |      |         |     |      |
| 1 | BAP63926.1 | type<br>proa3 | I | collagen<br>chain | GLpGQDGRpGA<br>p             | 23.16 | 1168.55 | 18.8 | 2.0E+07 | 538 | 549  |
|   |            |               |   |                   | [ <i>Anguilla japonica</i> ] |       |         |      |         |     |      |
| 1 | BAP63926.1 | type<br>proa3 | I | collagen<br>chain | FpGADGAGGPK                  | 28.06 | 988.46  | 20.9 | 1.9E+07 | 476 | 486  |
|   |            |               |   |                   | [ <i>Anguilla japonica</i> ] |       |         |      |         |     |      |
| 1 | BAP63926.1 | type<br>proa3 | I | collagen<br>chain | eGSpGHDGApG<br>RDGAAGPK      | 33.58 | 1745.77 | 16   | 1.9E+07 | 996 | 1014 |
|   |            |               |   |                   | [ <i>Anguilla japonica</i> ] |       |         |      |         |     |      |
| 1 | BAP63926.1 | type<br>proa3 | I | collagen<br>chain | AGPpGPpGPGG<br>KE            | 20.03 | 1148.55 | 18.4 | 1.7E+07 | 873 | 885  |
|   |            |               |   |                   | [ <i>Anguilla japonica</i> ] |       |         |      |         |     |      |
| 1 | BAP63926.1 | type<br>proa3 | I | collagen<br>chain | GAPGKDGDVG<br>ApGApGPA       | 19.07 | 1521.71 | 20.7 | 1.6E+07 | 589 | 606  |
|   |            |               |   |                   | [ <i>Anguilla japonica</i> ] |       |         |      |         |     |      |
| 1 | BAP63926.1 | type<br>proa3 | I | collagen<br>chain | KDGDVGApGAp<br>GPA           | 21.06 | 1239.57 | 19   | 1.4E+07 | 593 | 606  |
|   |            |               |   |                   | [ <i>Anguilla japonica</i> ] |       |         |      |         |     |      |
| 1 | BAP63926.1 | type<br>proa3 | I | collagen<br>chain | GpPpPpGPGGK                  | 18.74 | 948.47  | 16.7 | 1.3E+07 | 874 | 884  |
|   |            |               |   |                   | [ <i>Anguilla japonica</i> ] |       |         |      |         |     |      |
| 1 | BAP63926.1 | type<br>proa3 | I | collagen<br>chain | GPPGPPGLnGPQ                 | 21.53 | 1087.53 | 31.3 | 1.2E+07 | 169 | 180  |

---

---

[*Anguilla japonica*]

1      BAP63926.1    type I collagen    GLpGPIGPpGPR    17.26    1145.62    29    1.0E+07    1138    1149  
                  proa3            chain

[*Anguilla japonica*]

1      BAP63926.1    type I collagen    GLPGQDGRpG    22.33    968.47    20.1    9.9E+06    538    547  
                  proa3            chain

[*Anguilla japonica*]

1      BAP63926.1    type I collagen    GEpGEpGASGP    19.92    1426.61    21.7    9.1E+06    187    201  
                  proa3            chain    MGPR

[*Anguilla japonica*]

1      BAP63926.1    type I collagen    LpGPPGGAGEK    17.26    994.51    21.5    8.9E+06    752    762  
                  proa3            chain

[*Anguilla japonica*]

1      BAP63926.1    type I collagen    DGMnGLpGPIG    20.13    1563.74    35.2    6.3E+06    1134    1149  
                  proa3            chain    PpGPR

[*Anguilla japonica*]

1      BAP63926.1    type I collagen    AGPpGPPGPGG    19.71    1003.51    18.7    4.4E+06    873    884  
                  proa3            chain    K

[*Anguilla japonica*]

1      BAP63926.1    type I collagen    EpGPAGPAGPH    27.41    1001.46    18.5    2.9E+06    902    912  
                  proa3            chain

[*Anguilla japonica*]

1      BAP63926.1    type I collagen    GETGGpGPSGP    21.87    1255.54    16.6    2.2E+06    646    659  
                  proa3            chain    RGD

[*Anguilla japonica*]

1      BAP63926.1    type I collagen    eGSpGHDGApG    19.46    1933.81    16.2    1.9E+06    996    1016  
                  proa3            chain    RDGAAGpKGD

[*Anguilla japonica*]

1      BAP63926.1    type I collagen    TGDTGpKGDAG    20.92    1664.74    16.8    1.7E+06    810    828  
                  proa3            chain    ApGHAGPA

[*Anguilla japonica*]

---

---

|   |            |               |   |                   |                              |       |         |      |         |     |     |
|---|------------|---------------|---|-------------------|------------------------------|-------|---------|------|---------|-----|-----|
| 1 | BAP63926.1 | type<br>proa3 | I | collagen<br>chain | GMTGSpGSpGP<br>DGK           | 20.55 | 1275.54 | 16.9 | 1.6E+06 | 520 | 533 |
|   |            |               |   |                   | [ <i>Anguilla japonica</i> ] |       |         |      |         |     |     |
| 1 | BAP63926.1 | type<br>proa3 | I | collagen<br>chain | GATGEAGKpGE<br>GGPA          | 21.07 | 1270.58 | 16.3 | 1.3E+06 | 631 | 645 |
|   |            |               |   |                   | [ <i>Anguilla japonica</i> ] |       |         |      |         |     |     |
| 1 | BAP63926.1 | type<br>proa3 | I | collagen<br>chain | GDAGApGHAG<br>PA             | 24.15 | 992.43  | 15.8 | 1.0E+06 | 817 | 828 |
|   |            |               |   |                   | [ <i>Anguilla japonica</i> ] |       |         |      |         |     |     |
| 1 | BAP63926.1 | type<br>proa3 | I | collagen<br>chain | GLPGQDGR                     | 19.52 | 798.4   | 19.4 | 4.9E+05 | 538 | 545 |
|   |            |               |   |                   | [ <i>Anguilla japonica</i> ] |       |         |      |         |     |     |
| 2 | BAP63924.1 | type<br>proa1 | I | collagen<br>chain | GQDGRpGpGP<br>A              | 27.83 | 1136.52 | 17.6 | 4.4E+08 | 547 | 558 |
|   |            |               |   |                   | [ <i>Anguilla japonica</i> ] |       |         |      |         |     |     |
| 2 | BAP63924.1 | type<br>proa1 | I | collagen<br>chain | GfPgsDgAgGp<br>K             | 32.53 | 1061.48 | 20.8 | 1.4E+08 | 481 | 492 |
|   |            |               |   |                   | [ <i>Anguilla japonica</i> ] |       |         |      |         |     |     |
| 2 | BAP63924.1 | type<br>proa1 | I | collagen<br>chain | GPAGpPpGKnGE<br>DGE          | 22.49 | 1297.54 | 16.6 | 7.0E+07 | 208 | 221 |
|   |            |               |   |                   | [ <i>Anguilla japonica</i> ] |       |         |      |         |     |     |
| 2 | BAP63924.1 | type<br>proa1 | I | collagen<br>chain | FpGSDGAGGpK                  | 29.4  | 1004.46 | 19.4 | 5.4E+07 | 482 | 492 |
|   |            |               |   |                   | [ <i>Anguilla japonica</i> ] |       |         |      |         |     |     |
| 2 | BAP63924.1 | type<br>proa1 | I | collagen<br>chain | GDAGApGPAGP<br>T             | 23.93 | 982.44  | 19.2 | 5.1E+07 | 823 | 834 |
|   |            |               |   |                   | [ <i>Anguilla japonica</i> ] |       |         |      |         |     |     |
| 2 | BAP63924.1 | type<br>proa1 | I | collagen<br>chain | NSGpPpGpGPA                  | 19.95 | 978.44  | 20.5 | 4.5E+07 | 878 | 888 |
|   |            |               |   |                   | [ <i>Anguilla japonica</i> ] |       |         |      |         |     |     |
| 2 | BAP63924.1 | type<br>proa1 | I | collagen<br>chain | GQDGRpGpGP                   | 23.08 | 1065.48 | 17.7 | 3.3E+07 | 547 | 557 |

---



---

|   |                    |                 |                     |                              |       |         |      |         |      |      |
|---|--------------------|-----------------|---------------------|------------------------------|-------|---------|------|---------|------|------|
| 2 | BAP63924.1         | type I collagen | proa1 chain         | GPDGApGSRGE<br>pGSpGPA       | 21.02 | 1609.7  | 17.4 | 6.6E+06 | 349  | 366  |
|   |                    |                 |                     | [ <i>Anguilla japonica</i> ] |       |         |      |         |      |      |
| 2 | BAP63924.1         | type I collagen | proa1 chain         | GEAGApGEnGT<br>pGAmGPR       | 18.03 | 1673.7  | 18.5 | 5.9E+06 | 274  | 291  |
|   |                    |                 |                     | [ <i>Anguilla japonica</i> ] |       |         |      |         |      |      |
| 2 | BAP63924.1         | type I collagen | proa1 chain         | GQDGRpGppGP<br>A             | 21.46 | 1152.52 | 16.6 | 5.1E+06 | 547  | 558  |
|   |                    |                 |                     | [ <i>Anguilla japonica</i> ] |       |         |      |         |      |      |
| 2 | BAP63924.1         | type I collagen | proa1 chain         | GDTGPAGpKGE                  | 19.55 | 1000.45 | 16.5 | 3.4E+06 | 265  | 275  |
|   |                    |                 |                     | [ <i>Anguilla japonica</i> ] |       |         |      |         |      |      |
| 2 | BAP63924.1         | type I collagen | proa1 chain         | QPGGPGGER                    | 23.76 | 910.43  | 18.9 | 2.8E+06 | 972  | 981  |
|   |                    |                 |                     | [ <i>Anguilla japonica</i> ] |       |         |      |         |      |      |
| 2 | BAP63924.1         | type I collagen | proa1 chain         | EGTpGAEGPSG<br>R             | 24.94 | 1129.5  | 16.1 | 2.3E+06 | 1002 | 1013 |
|   |                    |                 |                     | [ <i>Anguilla japonica</i> ] |       |         |      |         |      |      |
| 2 | BAP63924.1         | type I collagen | proa1 chain         | GPAGpPGKnGE<br>DGESGKpGR     | 21.33 | 1895.86 | 15.2 | 1.0E+06 | 208  | 227  |
|   |                    |                 |                     | [ <i>Anguilla japonica</i> ] |       |         |      |         |      |      |
| 3 | XP_0352606<br>97.1 | collagen type I | alpha 1b isoform X1 | GQDGRpGppGP<br>A             | 27.83 | 1136.52 | 17.6 | 4.4E+08 | 542  | 553  |
|   |                    |                 |                     | [ <i>Anguilla anguilla</i> ] |       |         |      |         |      |      |
| 3 | XP_0352606<br>97.1 | collagen type I | alpha 1b isoform X1 | GLpGQDGRpG                   | 17.25 | 984.46  | 17.8 | 6.2E+07 | 539  | 548  |
|   |                    |                 |                     | [ <i>Anguilla anguilla</i> ] |       |         |      |         |      |      |
| 3 | XP_0352606<br>97.1 | collagen type I | alpha 1b isoform X1 | GQDGRpGppGP                  | 23.08 | 1065.48 | 17.7 | 3.3E+07 | 542  | 552  |
|   |                    |                 |                     | [ <i>Anguilla anguilla</i> ] |       |         |      |         |      |      |
| 3 | XP_0352606<br>97.1 | collagen type I | alpha 1b isoform X1 | GpPpPpPGGK                   | 18.74 | 948.47  | 16.7 | 1.3E+07 | 875  | 885  |

---

---

|                            |            |                     |          |              |       |         |      |         |     |     |  |
|----------------------------|------------|---------------------|----------|--------------|-------|---------|------|---------|-----|-----|--|
| <i>[Anguilla anguilla]</i> |            |                     |          |              |       |         |      |         |     |     |  |
| 3                          | XP_0352606 | collagen            | type I   | GLPGQDGRpG   | 22.33 | 968.47  | 20.1 | 9.9E+06 | 539 | 548 |  |
|                            | 97.1       | alpha 1b isoform X1 |          |              |       |         |      |         |     |     |  |
| <i>[Anguilla anguilla]</i> |            |                     |          |              |       |         |      |         |     |     |  |
| 3                          | XP_0352606 | collagen            | type I   | GQDGRpGppGP  | 21.46 | 1152.52 | 16.6 | 5.1E+06 | 542 | 553 |  |
|                            | 97.1       | alpha 1b isoform X1 |          | A            |       |         |      |         |     |     |  |
| <i>[Anguilla anguilla]</i> |            |                     |          |              |       |         |      |         |     |     |  |
| 3                          | XP_0352606 | collagen            | type I   | EGGPAGETGSP  | 17.8  | 1352.58 | 19.2 | 6.3E+05 | 642 | 657 |  |
|                            | 97.1       | alpha 1b isoform X1 |          | GPSGP        |       |         |      |         |     |     |  |
| <i>[Anguilla anguilla]</i> |            |                     |          |              |       |         |      |         |     |     |  |
| 4                          | BAP63925.1 | type I              | collagen | EGSpGNDGPpG  | 22.53 | 1526.66 | 17.3 | 3.7E+08 | 923 | 938 |  |
|                            |            | proa2               | chain    | RpGVS        |       |         |      |         |     |     |  |
| <i>[Anguilla japonica]</i> |            |                     |          |              |       |         |      |         |     |     |  |
| 4                          | BAP63925.1 | type I              | collagen | GEpGEpGQSGP  | 31.61 | 1451.66 | 20   | 1.6E+08 | 114 | 128 |  |
|                            |            | proa2               | chain    | VGPR         |       |         |      |         |     |     |  |
| <i>[Anguilla japonica]</i> |            |                     |          |              |       |         |      |         |     |     |  |
| 4                          | BAP63925.1 | type I              | collagen | EGSpGNDGPpG  | 29.12 | 1583.68 | 17.6 | 7.0E+07 | 923 | 939 |  |
|                            |            | proa2               | chain    | RpGVSG       |       |         |      |         |     |     |  |
| <i>[Anguilla japonica]</i> |            |                     |          |              |       |         |      |         |     |     |  |
| 4                          | BAP63925.1 | type I              | collagen | qGHpGEpGEpG  | 25.47 | 1869.82 | 21.3 | 4.1E+07 | 110 | 128 |  |
|                            |            | proa2               | chain    | QSGPVGPR     |       |         |      |         |     |     |  |
| <i>[Anguilla japonica]</i> |            |                     |          |              |       |         |      |         |     |     |  |
| 4                          | BAP63925.1 | type I              | collagen | GSpGNDGPpGR  | 28.26 | 1397.62 | 16.9 | 3.7E+07 | 924 | 938 |  |
|                            |            | proa2               | chain    | pGVS         |       |         |      |         |     |     |  |
| <i>[Anguilla japonica]</i> |            |                     |          |              |       |         |      |         |     |     |  |
| 4                          | BAP63925.1 | type I              | collagen | GSpGnDGPpGRp | 21.21 | 1398.6  | 17.2 | 3.5E+07 | 924 | 938 |  |
|                            |            | proa2               | chain    | GVS          |       |         |      |         |     |     |  |
| <i>[Anguilla japonica]</i> |            |                     |          |              |       |         |      |         |     |     |  |
| 4                          | BAP63925.1 | type I              | collagen | EGSPGNDGPpG  | 24    | 1510.66 | 18.3 | 2.5E+07 | 923 | 938 |  |
|                            |            | proa2               | chain    | RpGVS        |       |         |      |         |     |     |  |
| <i>[Anguilla japonica]</i> |            |                     |          |              |       |         |      |         |     |     |  |

---

---

|   |            |                 |                              |       |         |      |         |     |     |
|---|------------|-----------------|------------------------------|-------|---------|------|---------|-----|-----|
| 4 | BAP63925.1 | type I collagen | EGSpGnDGPpGR                 | 22.23 | 1527.64 | 18   | 1.5E+07 | 923 | 938 |
|   |            | proa2 chain     | pGVS                         |       |         |      |         |     |     |
|   |            |                 | [ <i>Anguilla japonica</i> ] |       |         |      |         |     |     |
| 4 | BAP63925.1 | type I collagen | EGSpGNDGPpG                  | 29.89 | 1324.56 | 16.9 | 1.4E+07 | 923 | 936 |
|   |            | proa2 chain     | RPG                          |       |         |      |         |     |     |
|   |            |                 | [ <i>Anguilla japonica</i> ] |       |         |      |         |     |     |
| 4 | BAP63925.1 | type I collagen | GHpGEpGEpGQ                  | 23.83 | 1758.79 | 18.3 | 1.2E+07 | 111 | 128 |
|   |            | proa2 chain     | SGPVGPR                      |       |         |      |         |     |     |
|   |            |                 | [ <i>Anguilla japonica</i> ] |       |         |      |         |     |     |
| 4 | BAP63925.1 | type I collagen | GHPGEpGEpGQ                  | 27.69 | 1742.8  | 18.9 | 1.1E+07 | 111 | 128 |
|   |            | proa2 chain     | SGPVGPR                      |       |         |      |         |     |     |
|   |            |                 | [ <i>Anguilla japonica</i> ] |       |         |      |         |     |     |
| 4 | BAP63925.1 | type I collagen | EGSpGNDGPpG                  | 27.12 | 1439.63 | 18.5 | 1.1E+07 | 923 | 937 |
|   |            | proa2 chain     | RpGV                         |       |         |      |         |     |     |
|   |            |                 | [ <i>Anguilla japonica</i> ] |       |         |      |         |     |     |
| 4 | BAP63925.1 | type I collagen | EGSpGNDGPPG                  | 31.47 | 1324.56 | 16.5 | 8.9E+06 | 923 | 936 |
|   |            | proa2 chain     | RpG                          |       |         |      |         |     |     |
|   |            |                 | [ <i>Anguilla japonica</i> ] |       |         |      |         |     |     |
| 4 | BAP63925.1 | type I collagen | EGSPGNDGPpG                  | 20.19 | 1324.56 | 16.1 | 8.9E+06 | 923 | 936 |
|   |            | proa2 chain     | RpG                          |       |         |      |         |     |     |
|   |            |                 | [ <i>Anguilla japonica</i> ] |       |         |      |         |     |     |
| 4 | BAP63925.1 | type I collagen | GSpGnDGPpGRp                 | 26.46 | 1455.62 | 17.5 | 6.9E+06 | 924 | 939 |
|   |            | proa2 chain     | GVSG                         |       |         |      |         |     |     |
|   |            |                 | [ <i>Anguilla japonica</i> ] |       |         |      |         |     |     |
| 4 | BAP63925.1 | type I collagen | HPGEpGEpGQS                  | 21.51 | 1685.78 | 18.7 | 5.7E+06 | 112 | 128 |
|   |            | proa2 chain     | GPVGPR                       |       |         |      |         |     |     |
|   |            |                 | [ <i>Anguilla japonica</i> ] |       |         |      |         |     |     |
| 4 | BAP63925.1 | type I collagen | SpGNDGPpGRp                  | 18.56 | 1340.6  | 17   | 5.2E+06 | 925 | 938 |
|   |            | proa2 chain     | GVS                          |       |         |      |         |     |     |
|   |            |                 | [ <i>Anguilla japonica</i> ] |       |         |      |         |     |     |
| 4 | BAP63925.1 | type I collagen | EGSpGnDGPpG                  | 23.3  | 1584.67 | 18   | 3.3E+06 | 923 | 939 |
|   |            | proa2 chain     | RpGVSG                       |       |         |      |         |     |     |

---



[*Anguilla japonica*]

|   |                    |                                                 |                              |       |         |      |         |     |     |
|---|--------------------|-------------------------------------------------|------------------------------|-------|---------|------|---------|-----|-----|
| 4 | BAP63925.1         | type I collagen<br>proa2 chain                  | EGSpGNDGPpG<br>RP            | 23.54 | 1267.54 | 17.4 | 1.5E+06 | 923 | 935 |
|   |                    |                                                 | [ <i>Anguilla japonica</i> ] |       |         |      |         |     |     |
| 4 | BAP63925.1         | type I collagen<br>proa2 chain                  | QGHPGEpGEpG<br>QSGPVGPR      | 17.1  | 1870.86 | 19   | 1.3E+06 | 110 | 128 |
|   |                    |                                                 | [ <i>Anguilla japonica</i> ] |       |         |      |         |     |     |
| 4 | BAP63925.1         | type I collagen<br>proa2 chain                  | EGSPGnDGPPG<br>RpGVS         | 24.8  | 1511.65 | 18.7 | 9.8E+05 | 923 | 938 |
|   |                    |                                                 | [ <i>Anguilla japonica</i> ] |       |         |      |         |     |     |
| 4 | BAP63925.1         | type I collagen<br>proa2 chain                  | EGSpGnDGPPGR<br>pG           | 30.13 | 1341.54 | 15.7 | 9.1E+05 | 923 | 936 |
|   |                    |                                                 | [ <i>Anguilla japonica</i> ] |       |         |      |         |     |     |
| 5 | XP_0352510<br>69.1 | collagen alpha-2(I)<br>chain-like isoform<br>X2 | EGSpGNDGPpG<br>RpGAA         | 28.84 | 1482.63 | 16.3 | 4.0E+08 | 918 | 933 |
|   |                    |                                                 | [ <i>Anguilla anguilla</i> ] |       |         |      |         |     |     |
| 5 | XP_0352510<br>69.1 | collagen alpha-2(I)<br>chain-like isoform<br>X2 | EGSpGnDGPPGR<br>pGAA         | 22.47 | 1483.62 | 16.7 | 5.8E+07 | 918 | 933 |
|   |                    |                                                 | [ <i>Anguilla anguilla</i> ] |       |         |      |         |     |     |
| 5 | XP_0352510<br>69.1 | collagen alpha-2(I)<br>chain-like isoform<br>X2 | GPAGPGGPpGA                  | 18.62 | 849.4   | 20.7 | 4.6E+07 | 757 | 767 |
|   |                    |                                                 | [ <i>Anguilla anguilla</i> ] |       |         |      |         |     |     |
| 5 | XP_0352510<br>69.1 | collagen alpha-2(I)<br>chain-like isoform<br>X2 | EGSPGNDGPpG<br>RpGAA         | 27.98 | 1466.64 | 17.2 | 3.1E+07 | 918 | 933 |
|   |                    |                                                 | [ <i>Anguilla anguilla</i> ] |       |         |      |         |     |     |

---





---

|    |            |                                                                                                   |                       |       |         |      |         |      |      |
|----|------------|---------------------------------------------------------------------------------------------------|-----------------------|-------|---------|------|---------|------|------|
| 10 | XP_0352428 | actin alpha cardiac muscle 1-like<br>[ <i>Anguilla anguilla</i> ]                                 | FAGDDAPR              | 25.22 | 847.38  | 19.6 | 4.0E+07 | 23   | 30   |
| 10 | XP_0352428 | actin alpha cardiac muscle 1-like<br>[ <i>Anguilla anguilla</i> ]                                 | GFAGDDAPR             | 30.51 | 904.4   | 21.7 | 3.9E+07 | 22   | 30   |
| 11 | XP_0352773 | collagen alpha-4(IV) chain-like<br>[ <i>Anguilla anguilla</i> ]                                   | GpPGPPGPpGPP<br>GNPGP | 22.34 | 1476.7  | 28.7 | 2.4E+06 | 1016 | 1032 |
| 12 | XP_0352778 | collagen alpha-1(X) chain<br>[ <i>Anguilla anguilla</i> ]                                         | GEnGFpGPR             | 17.94 | 946.41  | 22.8 | 7.8E+06 | 435  | 443  |
| 13 | XP_0352454 | collagen alpha-1(XII) chain-like isoform X3<br>[ <i>Anguilla anguilla</i> ]                       | EGpSGpRGPSGP          | 18.91 | 1125.51 | 19.3 | 1.2E+06 | 1680 | 1691 |
| 14 | XP_0352728 | collagen and calcium-binding EGF domain-containing protein 1-like<br>[ <i>Anguilla anguilla</i> ] | PGSpGPpGAP            | 18.23 | 864.4   | 20.3 | 1.3E+08 | 247  | 256  |
| 14 | XP_0352728 | collagen and calcium-binding EGF domain-containing protein 1-like<br>[ <i>Anguilla anguilla</i> ] | pGSPGPpGAP            | 17.22 | 864.4   | 20.7 | 1.3E+08 | 247  | 256  |
| 15 | XP_0352671 | autophagy-related protein 2 homolog A<br>[ <i>Anguilla anguilla</i> ]                             | PGSpGPpGAP            | 18.23 | 864.4   | 20.3 | 1.3E+08 | 489  | 498  |

---



---

[*Anguilla anguilla*]

|    |            |              |             |          |       |        |      |         |     |     |
|----|------------|--------------|-------------|----------|-------|--------|------|---------|-----|-----|
| 23 | XP_0352895 | cyclic       | nucleotide- | TIGEMpAP | 18.31 | 830.38 | 24.9 | 7.0E+05 | 336 | 343 |
|    | 86.1       | gated        | olfactory   |          |       |        |      |         |     |     |
|    |            | channel-like |             |          |       |        |      |         |     |     |

[*Anguilla anguilla*]

<sup>a</sup> Accession number indicates the accession number assigned to each protein sequence by NCBI database. <sup>b</sup> Peptide sequence represented with their corresponding N- and C-terminal amino acid residues. Lowercase letters indicated that the amino acid has been modified, for example, p: hydroxyproline; m: oxidation (M); n: deamidation (NQ); e: pyro-Glu from E; q: pyro-Glu from Q.

---
